# Supplementary material
Source: PubMed Central journal article supplement (PMC8633721)

Fig. S1

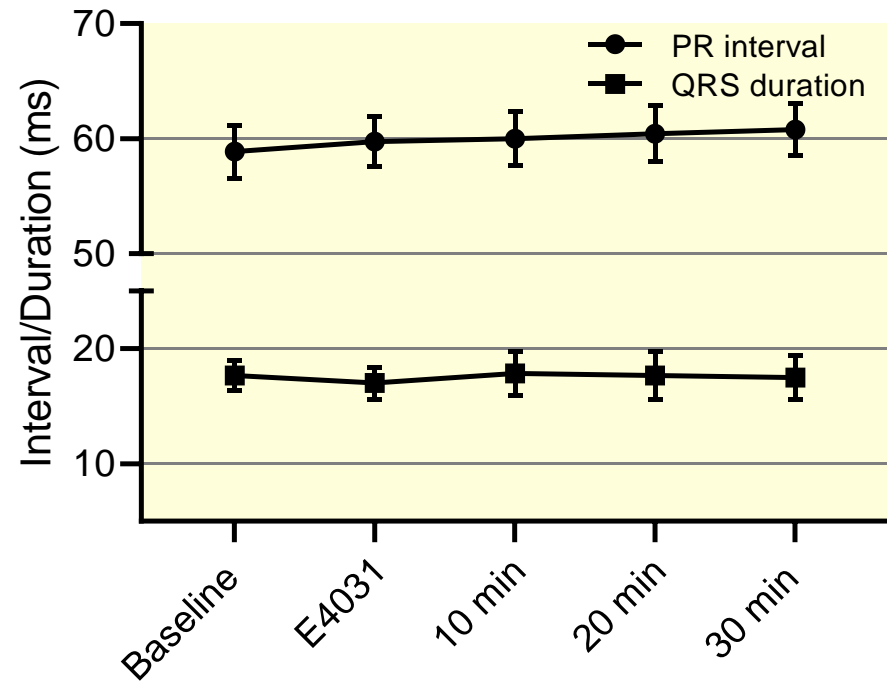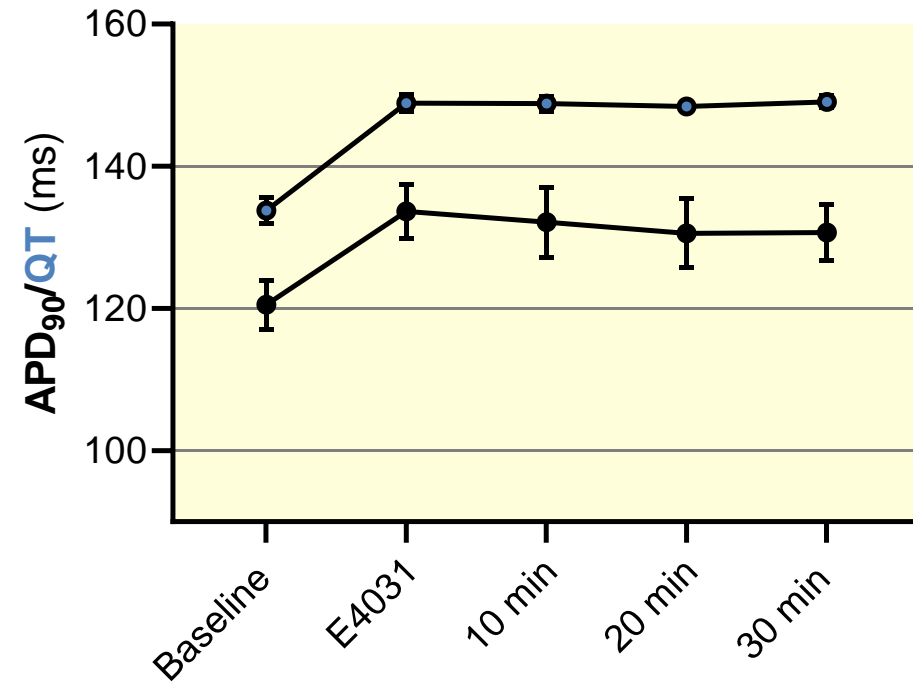

Supplement: NIHMS1758276-supplement-fS1.pdf [file NIHMS1758276-supplement-fS1.pdf]

Fig. S2

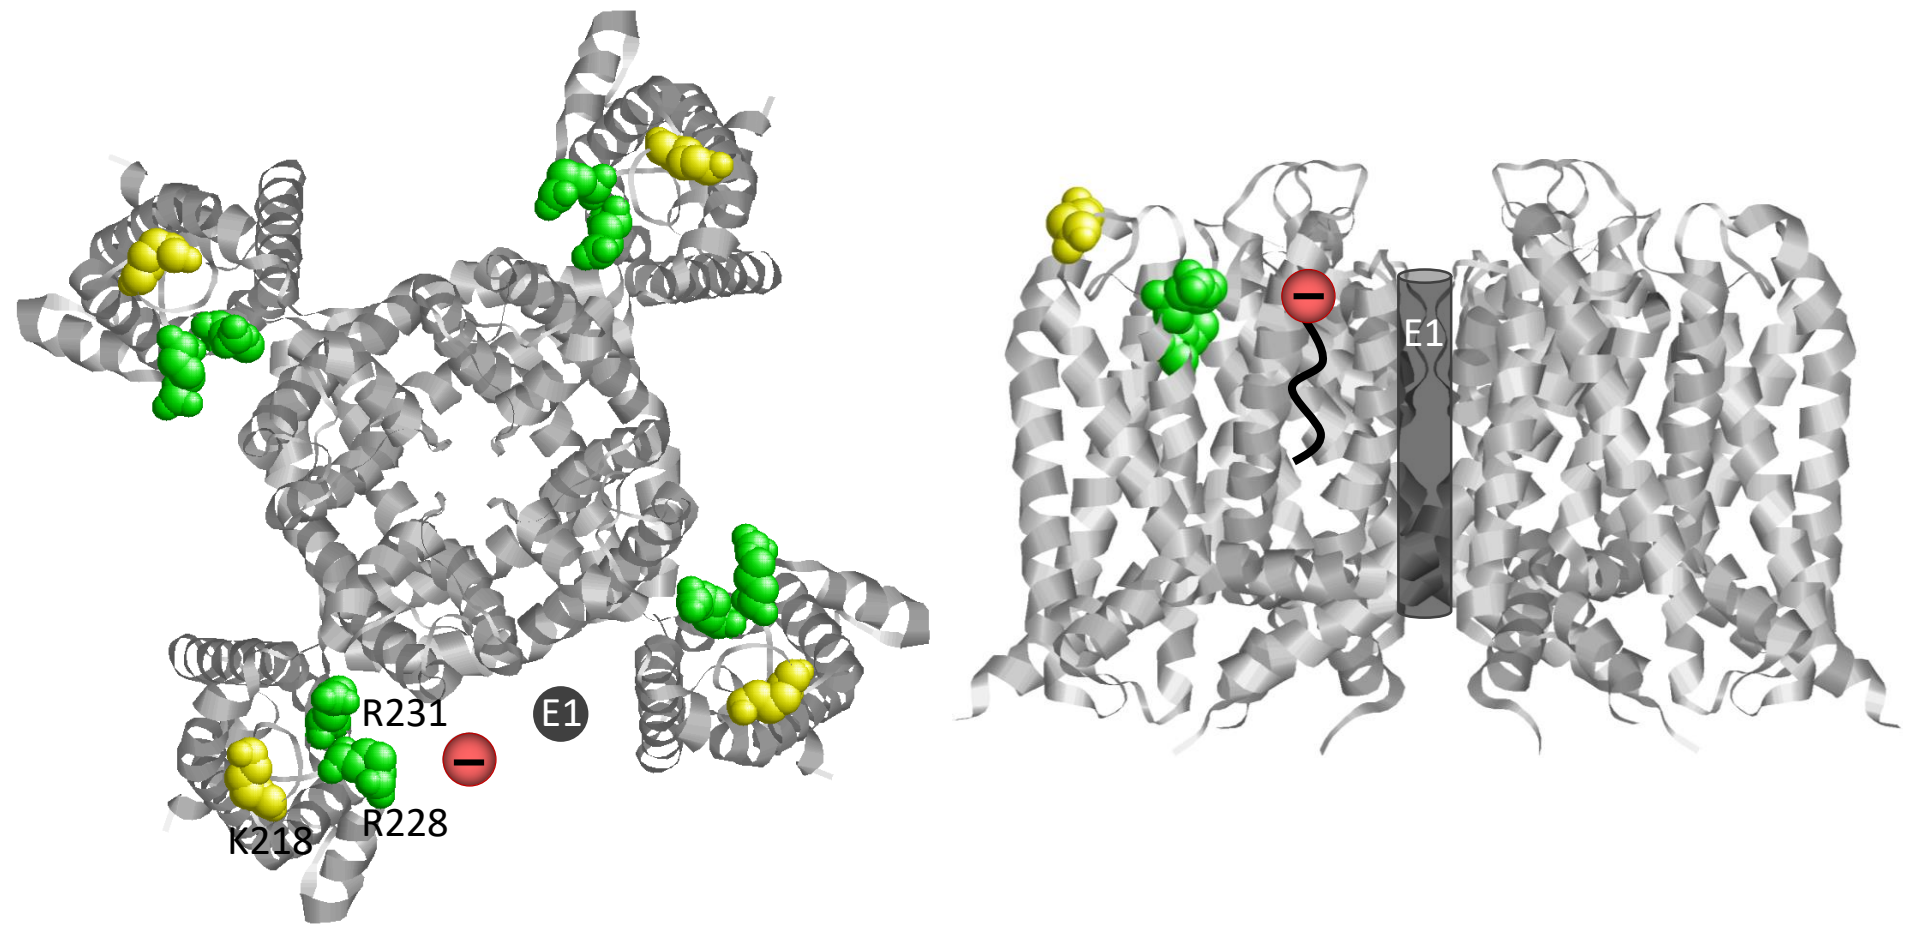

Supplement: NIHMS1758276-supplement-fS2.pdf [file NIHMS1758276-supplement-fS2.pdf]
